1 **Rich polymorphic variants of alpha satellite 34mer higher order repeats**  
2 **in hg38 assembly of human chromosome Y**

3 Ines Vlahović<sup>1</sup>, Matko Glunčić<sup>1\*</sup>, Vladimir Paar<sup>1,2</sup>

4 <sup>1</sup>Faculty of Science, University of Zagreb, 10000 Zagreb, Croatia. <sup>2</sup>Croatian Academy of  
5 Sciences and Arts, 10000 Zagreb, Croatia.

6

7 Short Title: **Polymorphic variants of alpha satellite higher order repeats in**  
8 **human chromosome Y**

9

10 Corresponding author: dr.sc. Matko Glunčić

11 Address: Faculty of Science, University of Zagreb, Bijenička cesta 25, 10000 Zagreb,  
12 Croatia

13 Tel: +385 1 4680321

14 Fax: +385 1 4680321

15 Email: [matko@phy.hr](mailto:matko@phy.hr)

16

## 17 **Abstract**

18 A challenging problem in human population genetics is related to the unique role of  
19 human Y chromosome, with properties that distinguish humans from other species.  
20 Centromeres in primate genomes are constituted of tandem repeats of ~171 bp alpha  
21 satellite monomers, commonly organized into higher order repeats (HORs). Because of  
22 gaps in DNA sequencing, HOR regions as genomic "black holes" have been understudied  
23 in spite of crucial importance. Only recently the sequencing of more complete satellite  
24 DNAs becomes accessible. In human Y chromosome the largest alpha satellite higher  
25 order repeat unit 34/36mer was found, but its polymorphic variants were not investigated.  
26 Here, we study the human Y chromosome centromeric genomic sequence from hg38  
27 assembly using our novel ALPHAsub algorithm for simple identification of alpha  
28 satellite arrays and robust GRM algorithm for HOR identification in repeat sequences.  
29 We determine the monomer alignment scheme for alpha satellite HOR array based on  
30 canonical 34mer HOR, discovering a wealth of novel polymorphic variants which include  
31 the HOR-type monomer duplications, monomer deletions/insertions or rearrangements  
32 and non-HOR insertions.

33

## 34 **Author Summary**

35 The centromere is important for segregation of chromosomes during cell division  
36 in eukaryotes. Its destabilization results in chromosomal missegregation, aneuploidy,  
37 hallmarks of cancers and birth defects. In primate genomes centromeres contain tandem  
38 repeats of ~171 bp alpha satellite DNA, commonly organized into higher order repeats  
39 (HORs). In this work, we used our bioinformatics algorithms to study the human Y

40 chromosome centromeric genomic sequence and we discover a wealth of novel  
41 polymorphic variants which include the HOR-type monomer duplications, monomer  
42 deletions/insertions or rearrangements and non-HOR insertions. These results could help  
43 to understand the role of alpha satellites and alpha HOR structures in centromeric  
44 organization and function, in particular their role in creating a functional kinetochore that  
45 is crucial for chromosome segregation during cell division.

46

## 47 **Introduction**

48 It was noted that "the properties of the Y chromosome read like a list of violations  
49 of the rulebook of human genetics" and "it seems the more we know about the Y  
50 chromosome, the more questions we have" [1]. Studies of atypical structure of human Y  
51 chromosome were largely focused on gene related content [2]. On the other hand, human  
52 Y chromosome is replete with pronounced noncoding repetitive sequences [3-7].

53 Centromeres of all human chromosomes consist of tandem repeats of alpha satellite  
54 monomers, commonly organized as higher order repeats (HORs) superimposed on  
55 approximately periodic tandem of alpha satellite monomers [8-12]. Because of gaps in  
56 DNA sequencing, these HOR regions, like genomic "black holes" [13, 14], have been  
57 understudied in spite of their crucial importance [15, 16]. With an impressive recent  
58 progress in sequencing technology [4, 16-18], the study of more complete satellite DNAs  
59 becomes accessible [4, 19].

60 An alpha satellite HOR in human chromosome Y was found previously by  
61 restriction map estimates [3]. It is organized into tandemly repeating units, most of which  
62 are approximately 5.7 kb long while some variant units are about 6.0 kb long. Both the

63 5.7 kb and the 6.0 kb HOR units were found to consist of tandemly repeating alpha  
64 satellite monomers, with the 6.0 kb unit containing two more monomers compared to 5.7  
65 kb unit. Later, a value of 5.941 kb was reported for this HOR unit length [2].

66 Sequence contigs spanning junctions at the edges of the centromere array,  
67 becoming available, enabled more extensive bioinformatics analyses of repeat patterns in  
68 human genome [13, 20-24]. However, major gaps remained in the centromeric regions of  
69 human chromosomes, as "black holes" in genomes [13, 14, 25, 26].

70 Using GRM algorithm, the alpha satellite HORs were identified and analysed  
71 bioinformatically for previous incomplete and gapped Build 37.1 assembly for human  
72 and Build 2.1 for chimpanzee Y chromosome [27]. The human genome reference  
73 sequence was incomplete owing to the challenge of assembling long tracts of near-  
74 identical tandem repeats in centromeres.

75 An alpha satellite reference model has been recently produced and incorporated in  
76 the hg38 human genome assembly [28-30]. In the hg38 human genome assembly,  
77 centromere gaps have been filled by alpha satellite reference models, which are statistical  
78 representations of homogeneous HOR arrays [31]. Only recently, a long-read strategy  
79 was applied to a human centromere. A nanopore sequencing strategy was used to  
80 generate high-quality reads that span highly repetitive DNA in centromere of one  
81 individual human Y chromosome [4]. The DYZ3 array was assembled and characterized  
82 as HOR with 5.8 kb consensus sequence without repeat inversions [4]. Instances of 6.0  
83 kb HOR structural variant were detected, evidence for seven 6.0 kb copies within DYZ3  
84 array was found, present in two clusters separated by 110 kb, in accordance with  
85 predictions by previous restriction map estimates [32].

86

## 87 **Results**

88 Using robust ALPHAsub+GRM algorithm [27, 33, 34] we identify and analyse  
89 alpha satellite HOR arrays in hg38 assembly of Y chromosome (RefSeq Accession  
90 NC\_000024.10). The resulting alpha satellite HOR ideogram for centromeric region of  
91 hg38 assembly of Y chromosome is shown, with three HOR domains I-III (Fig. 1).

92 The alpha satellite arrays extracted in the first step are given in Table 1. The GRM  
93 algorithm was extended by introducing the method ALPHAsub used to identify positions  
94 of alpha satellite arrays in DNA sequence, regardless whether they are of HOR or  
95 nonHOR type. In this way we determined segments with alpha satellite arrays. We have  
96 found 28 different alpha satellite arrays in human chromosome Y, three of them arranged  
97 in 34mer/36mer HOR structures. Previously, for human chromosome Y, only the 5.7 kb  
98 and the 6.0 kb alpha satellite HOR units were found[2-4].

99 The GRM peak at 5786 bp corresponding to the major 34mer/36mer HOR in GRM  
100 diagram is sizable (Fig. 2), because of large number of approximately regular HOR  
101 copies in HOR array. Applying ALPHAsub+GRM algorithm we determined the  
102 monomer alignment schemes for alpha satellite HOR arrays in hg38 assembly for human  
103 Y chromosome in domains I, II, and III (Fig. 3a-c, respectively). Going along genome  
104 sequence, the monomers are positioned in the monomer alignment scheme in order of  
105 appearance. In constructing monomer alignment scheme monomers are assigned to the  
106 same monomer type if divergence is less than 5 % and are placed in the same column of  
107 the scheme. Otherwise, monomers do not belong to types included in HOR and are  
108 referred to as non-HOR monomers.

109 **Table 1 Alpha satellite arrays in centromeric/pericentromeric region of hg38**  
 110 **sequence of human chromosome Y obtained using ALPHAsub algorithm**

| No. | Start      | Mon.  | Div. | Length  | HOR                 |
|-----|------------|-------|------|---------|---------------------|
| 1.  | 1,637,224  | 27    | 12   | 4,286   | -                   |
| 2.  | 10,070,914 | 57    | 19   | 9,726   | -                   |
| 3.  | 10,080,743 | 42    | 19   | 7,243   | -                   |
| 4.  | 10,203,130 | 29    | 23   | 4,998   | -                   |
| 5.  | 10,210,271 | 28    | 23   | 4,729   | -                   |
| 6.  | 10,216,149 | 10    | 22   | 1,712   | -                   |
| 7.  | 10,217,906 | 13    | 25   | 2,237   | -                   |
| 8.  | 10,221,841 | 85    | 23   | 14,395  | -                   |
| 9.  | 10,237,641 | 4     | 17   | 684     | -                   |
| 10. | 10,243,293 | 140   | 20   | 23,817  | 34mer & variants    |
| 11. | 10,316,952 | 1,334 | 19   | 227,088 | 34/36mer & variants |
| 12. | 10,594,234 | 191   | 21   | 32,445  | 34mer & variants    |
| 13. | 10,598,964 | 7     | 14   | 1,196   | -                   |
| 14. | 10,605,088 | 3     | 15   | 512     | -                   |
| 15. | 17,652,508 | 5     | 26   | 862     | -                   |
| 16. | 17,654,005 | 61    | 34   | 10,357  | -                   |
| 17. | 17,668,888 | 6     | 25   | 10,254  | -                   |
| 18. | 17,671,863 | 75    | 28   | 12,830  | -                   |
| 19. | 17,688,354 | 8     | 30   | 1,337   | -                   |
| 20. | 17,696,370 | 30    | 28   | 5,180   | -                   |
| 21. | 17,701,886 | 20    | 27   | 3,417   | -                   |
| 22. | 18,200,883 | 20    | 27   | 3,417   | -                   |
| 23. | 18,204,636 | 30    | 28   | 5,180   | -                   |
| 24. | 18,216,495 | 8     | 30   | 1,337   | -                   |
| 25. | 18,221,493 | 75    | 28   | 12,830  | -                   |
| 26. | 18,236,274 | 6     | 25   | 1,024   | -                   |
| 27. | 18,241,814 | 62    | 34   | 10,525  | -                   |
| 28. | 18,252,814 | 6     | 26   | 1,033   | -                   |

111 <sup>a</sup>Mon., number of monomers in array; <sup>b</sup>Div., divergence (%) among monomers in array; <sup>c</sup>Length,  
 112 length of alpha satellite monomer array (bp).

113

114 The mean divergence among monomers within each HOR copy in domain I is  
 115 ~20%, and the mean divergence among monomers of the same type in different HOR  
 116 copies is ~0.5%. For 34mer HOR array in domain II the mean divergence is ~20 % and  
 117 ~3 %, respectively; and for 34mer HOR array in domain III ~20 % and ~1 %, respectively,  
 118 not counting monomer insertions/deletions. The corresponding consensus  
 119 sequences of monomers in 34/36mer are given in Supplementary Table 1.

120

## 121 **34/36mer HOR and its polymorphic variants in domain I**

122 Using ALPHAsub+GRM algorithm in domain I of hg38 assembly, the 40 HOR  
123 copies are obtained: 27 complete 34mer HOR copies (referred to as canonical) and 13  
124 polymorphic variants (Fig. 3a). The monomer types m8, m15 and m16 are absent in most  
125 of HOR copies and thus they are referred to as non-canonical monomers. In the aligned  
126 monomer scheme each horizontal bar presenting a monomer is characterized by its  
127 monomer type m1, m2, .... m37 and arrays of non-HOR monomers are characterized by  
128 arrow and symbol of insertion (for example  $a_1$  in Fig. 3a). For example, the HOR copy h1  
129 consists of 36 monomer tandems of types m1-m7 and m9-m37 (displayed by horizontal  
130 bars No. 1-7 and 9-37). HOR copy h37 consists of a 20 monomers, tandem m1-m7  
131 (monomers No. 1-7), monomer m9 (No. 9), tandem m28-m37 (monomers No. 28-37) and  
132 two non-HOR monomer array  $a_1$  inserted after monomer m9.

133 Four polymorphic variants are complete 36mers, three 32mers, three 35mers, one 27mer,  
134 one 24mer, and one 20mer (Table 2a). The four complete variant 36mer HOR copies  
135 arise from canonical 34mer by inserting after m14 two additional monomers. Such are  
136 HOR copies h1, h2, h32, h39. This HOR array, containing both 34mer and 36mer copies,  
137 is referred to as 34/36mer HOR. Occasional monomer duplications, similar as found here,  
138 appear also in alpha satellite HORs in some other human chromosomes (for example,  
139 [27, 35]).

140

141

142

143 **Table 2 Canonical alpha satellite 34mer HOR and its polymorphic variants in**  
 144 **domains I-III of hg38 assembly of human chromosome Y**

| <i>n</i> mer   | HOR copies | monomer |      | HOR copy                                       |
|----------------|------------|---------|------|------------------------------------------------|
|                |            | del.    | ins. |                                                |
| (a) domain I   |            |         |      |                                                |
| 34mer          | 27         |         |      | h3-h7, h10-h19, h22-h24, h26-h31, h33, h35-h36 |
| 36mer          | 4          |         | 2    | h1-h2, h32, h39                                |
| 35mer          | 3          |         | 1    | h9, h20, h38                                   |
| 32mer          | 3          | 4       | 2    | h8, h21, h25                                   |
| 27mer          | 1          | 7       |      | h34                                            |
| 24mer          | 1          | 10      |      | h40                                            |
| 20mer          | 1          | 16      | 2    | h37                                            |
| (b) domain II  |            |         |      |                                                |
| 34mer          | 1          |         |      | h4                                             |
| 28mer          | 1          | 16      | 12   | h3                                             |
| 21mer          | 1          | 13      |      | h2                                             |
| 18mer          | 2          | 16      |      | h1, h5                                         |
| (c) domain III |            |         |      |                                                |
| 35mer          | 2          |         | 1    | h3, h4                                         |
| 44mer          | 1          |         | 10   | h5                                             |
| 32mer          | 1          | 3       | 1    | h2                                             |
| 10mer          | 1          | 24      |      | h6                                             |
| 5mer           | 1          | 29      |      | h1                                             |

145 del = repeat monomer deletions expressed with respect to canonical 34mer; ins = repeat

146 and non-repeat monomer insertions.

147 Number *n* of monomers in *n*mer HOR implies the number of different types of monomers

148 present in HOR copy.

149

150 The variant 35mer HOR copies h9, h20 and h38 arise from canonical 34mer HOR

151 copy by duplicating the monomer m14, resulting in the variant monomer sequence ...

152 m13 m14 m14 m17 m18 ... This variant triplet of HOR copies characterizes domain I

153 and domain III. It is noted that monomer duplications appear in alpha satellite HORs also



154 in other human chromosomes (for example, [27, 35]). Monomer duplication is present in  
155 six variant HOR copies for domain I. A particular case is combined monomer  
156 duplication, deletion and insertion in HOR copies h8, h21 and h25. In these three variant  
157 32mer HOR copies the typical monomers m1-m7, m13-m14 and m17-m37 are intact.  
158 Then m5 is duplicated, a non-canonical monomer m8 is inserted and typical m9-m12  
159 monomers are absent. These three HOR copies appear as polymorphic variants, where the  
160 5-monomer region m8-m12 is distorted in a specific way, including replacement by one  
161 duplicate and one atypical monomer. This results in variant monomer sequence with ...  
162 m4, m5, m6, m7, m5, m8, m13, m14, m17...

163 Variant HOR copies h34 and h37 involve significant deletions of monomers, and  
164 h40 is located at the end of domain I and is missing last ten monomers (m28-m37).  
165 Variant HOR copy h37 also involve insertion of two non-HOR alpha satellite monomers  
166 (non-repeating monomers which don't have another copies within HOR structure)

167

### 168 **34mer HOR and its polymorphic variants in domain II**

169 The domains II and III have been inserted in the hg38 assembly sequence of Y  
170 chromosome in reverse orientation, considering the orientation of domain I. We have  
171 presented domain II and domain III monomer alignment schemes for canonical alpha  
172 satellite 34mer HORs and its polymorphic variants in direct orientations (Fig 3b and 3c)  
173 and we have conveniently adjust the start of HOR sequences to match the individual  
174 monomers from domains II and III to monomers in domain I (Fig 4a and 4b).

175 In domain II we identified segments classified in five 34mer HOR copies h1-h5  
176 (Fig. 3b and Table 2b). They contain 45 different types of alpha satellite monomers: out

177 of 34 canonical and 3 non-canonical monomers (m8, m15, m16) from domain I, all have  
178 counterparts in domain II. The corresponding similarity of monomer types between  
179 domains I vs. II are shown in Fig 4a. The other monomers are insertions of non-HOR  
180 monomers.

181 In this HOR array each of 34 HOR-monomers m1-m34 from domain I is repeated,  
182 most of them threefold. However, besides these HOR-repeating monomers, the HOR  
183 copy h3 has some inserted non-HOR monomers, appearing only once in the aligned  
184 scheme, labelled as b<sub>1</sub> (array of 8 non-HOR monomers). This array of 8 inserted  
185 monomers is similar (up to 5%) to array of 8 inserted monomers in domain III (labelled  
186 as c<sub>1</sub>) (Fig. 4d). This array are followed by a duplication of monomer m5, then by an  
187 insertion of non-canonical monomer m8, then by a tandem of HOR monomers m9-m4,  
188 then by an insertion of two non-canonical monomers m15 and m16, and then by a tandem  
189 of HOR monomers m17-m37.

190

### 191 **34mer HOR and its polymorphic variants in domain III**

192 Using ALPHAsub+GRM algorithm the scheme of aligned monomer structure for  
193 HORs in domain III with 6 HOR copies was determined (Fig. 3c and Table 2c). The  
194 corresponding consensus HOR unit is almost identical to consensus HOR unit in domain  
195 I (divergence ~0.3 %). The corresponding similarity of monomer types between domains  
196 I vs. III are shown in Fig 4b.

197 All six HOR copies in domain III are polymorphic variants of canonical 34mer HOR.  
198 Two HOR copies (h3 and h4) are 35mers, where both copies have one monomer  
199 duplicated (m14, like 35mers in domain I). The HOR copy h2 has one non-HOR

200 monomer insertion (marked as insertion  $c_2$  in Fig. 3c) and three monomers deletion (m35-  
201 m37). The HOR copy h5 contains 44 HOR monomer types, and is sizably distorted by  
202 addition of array of 8 non-HOR monomers (labelled as  $c_1$  in Fig 3c) that follow after m7  
203 and are continued by non-canonical monomer insertion m8. These additional 8 monomers  
204 diverge from all classical HOR monomers by more than 5% and are similar to 8  
205 additional monomers from domain II (Fig 4d). The structure of HOR copies h1 (5mer)  
206 and h6 (10mer) are determined by their location, the start and the end of domain III,  
207 respectively.

208 Full monomer divergence matrices between consensus monomers from domains I  
209 vs. II, I vs. III, and II vs. III are shown by heatmap in Fig. 4. As could be predicted from  
210 Fig 3, m15 and m16 in domains I and II have no monomer counterparts (below 5%  
211 identity) in domain III (Fig 4b and 4c).

212

## 213 **Discussion**

214 Recent rapidly improving second and third generation sequencing opens the  
215 possibility to determine complete ensemble of alpha satellite HORs in the whole human  
216 genome, which will enable broader investigations of alpha satellite HORs, their  
217 polymorphic variants and their influence on centromere dynamics. Previously, in  
218 chromosome Y, HOR with 5.8 kb consensus sequence and 6.0 kb HOR structural variant  
219 were detected [3, 4] that correspond to 34mer and 36mer HORs, respectively. In this  
220 paper, we have discovered a wealth of novel polymorphic variants, which include the  
221 HOR-type monomer duplications, monomer deletions/insertions or rearrangements and  
222 non-HOR insertions. In particular, these polimorphic varyants result with HOR structures

223 up to 44 monomers length. These results could help to understand the role of alpha  
224 satellites and alpha HOR structures in centromeric organization and function, in  
225 particular their role in formation of functional kinetochore. One could expect that rich  
226 long HOR repeat units will be found also in centromere of some other human  
227 chromosomes. The coming years may bring exciting new developments in HOR  
228 investigations.

229

## 230 **Methods**

231 In this study the hg38 assembly sequence of Y chromosome (RefSeq  
232 Accession.version NC\_000024.10) was used for HOR analysis downloaded from:  
233 [ftp://ftp.ncbi.nlm.nih.gov/genomes/H\\_sapiens/ARCHIVE/ANNOTATION\\_RELEASE.1](ftp://ftp.ncbi.nlm.nih.gov/genomes/H_sapiens/ARCHIVE/ANNOTATION_RELEASE.108/Assembled_chromosomes/seq/)  
234 [08/Assembled\\_chromosomes/seq/](ftp://ftp.ncbi.nlm.nih.gov/genomes/H_sapiens/ARCHIVE/ANNOTATION_RELEASE.108/Assembled_chromosomes/seq/).

235 Here we used our robust computational algorithm GRM - Global Repeat Map  
236 algorithm[27, 33, 34] convenient for HOR identification in novel centromeric repeat  
237 sequences and an ALPHAsub algorithm convenient for simple identification of alpha  
238 satellite arrays.

239

## 240 **ALPHAsub algorithm**

241 ALPHAsub algorithm is a simple method for extraction of alpha satellite tandem  
242 arrays from a given genomic sequence, irrespectively of whether they are organized into  
243 HORs or not. As a convenient "ideal key word" (a "seed"), we use a robust 28-bp  
244 segment from alpha satellite DNA sequences,  
245 TGAGAAACTGCTTTGTGATGTGTGCATT and its reverse complement. This choice

246 of a well conserved region of known alpha satellite tandem is based on our previous  
247 experience with alpha satellite tandem arrays [27, 33, 35]. First, using the Levenshtein  
248 distance algorithm [36], all positions in the whole chromosome are determined where the  
249 28-bp sequence of "ideal key word" or its reverse complement differs from a "real key  
250 word" by at most nine nucleotides. Second, the distances between positions of  
251 neighbouring "real key words" are calculated. Third, only those "real key words" are  
252 retained for which distance to its previous neighbour is approximately equal to 171 bp or  
253 to a multiple of 171 bp ( $d(n, n - 1) \sim m \cdot 171$ ;  $m = 1, 2, \dots$ ). In the latter case ( $m > 1$ ),  
254 the additional "real key words" (one for  $m = 2$ , two for  $m = 2$ , and so on) are  
255 determined in the sequence between "real key word" and its previous neighbour, using  
256 the Levenshtein distance algorithm, at positions with the smallest difference of "real key  
257 words" compared to "ideal key word" or its reverse complement. In general, a distance  
258 between the additional "real key words", obtained by this method, is always  
259 approximately equal to 171 bp. In this way, we determined positions of all alpha satellites  
260 within chromosome Y. In the next step, using positions of "real key words", all alpha  
261 satellites from hg38 DNA sequence for chromosome Y are extracted and different alpha  
262 satellite ensembles are identified. On this basis, we have designed our ALPHAsub  
263 algorithm and computer program. Applying ALPHAsub program to the hg38 sequence of  
264 Y chromosome we determine location of all alpha satellite arrays within genomic  
265 sequence. In this way we determine regions within Y chromosome that contain alpha  
266 satellites arrays.

267

268 **GRM algorithm**

269 Global repeat algorithm (GRM) is an efficient and robust novel method to identify  
270 and study repeats, especially HORs, in a given DNA sequence [27, 33, 34]. For long  
271 DNA sequences of whole chromosomes, the noise in GRM diagram increases with  
272 increasing length of HOR repeat unit. This noise is significantly reduced by applying  
273 GRM to those regions which contain alpha satellite arrays selected using ALPHAsub  
274 algorithm for analysis of the whole chromosome sequence. We note that the GRM  
275 algorithm chooses the starting point autonomously, causing a difference of starting point  
276 with respect to standardly used sequence of consensus monomer. This choice of starting  
277 point does not influence the results.

278

#### 279 **ALPHAsub+GRM algorithm: GRM algorithm expanded by ALPHAsub algorithm**

280 Successive application of ALPHAsub and GRM algorithms is used for  
281 identification and analysis of alpha satellite HORs in a whole chromosome sequence: in  
282 the first step we identify chromosome regions that contain alpha satellite arrays and in the  
283 second step we perform GRM computation for these regions. The algorithm is freely  
284 available on our web server genom.hazu.hr at <https://genom.hazu.hr/tools.html>. For  
285 identification of higher order structures, we use Needleman-Wunsch algorithm that  
286 creates a divergence matrix where diagonals highlight higher order structures of  $n$ -mers.  
287 We also show divergences in heatmap graphs.

288

#### 289 **Acknowledgements**

290 We thank C. Tyler-Smith for stimulating our interest for alpha satellites. We also  
291 acknowledge support from the QuantiXLie Centre of Excellence, a project cofinanced by

292 the Croatian Government and European Union through the European Regional  
293 Development Fund - the Competitiveness and Cohesion Operational Programme (Grant  
294 KK.01.1.1.01.0004), and the grant IP-2014-09-3626 from Croatian Science Foundation.

295

## 296 **Author Contributions**

297 I.V. and M.G. performed the computations. M.G. wrote computational algorithm  
298 ALPHAsub. V.P. supervised the study. All authors analysed computational results. V.P.  
299 wrote the manuscript. All authors read and approved the final version of the manuscript.

300

## 301 **References**

- 302 1. Jobling MA, Tyler-Smith C. The human Y chromosome: an evolutionary marker  
303 comes of age. *Nat Rev Genet.* 2003;4(8):598-612. doi: 10.1038/nrg1124. PubMed PMID:  
304 12897772.
- 305 2. Skaletsky H, Kuroda-Kawaguchi T, Minx PJ, Cordum HS, Hillier L, Brown LG, et al.  
306 The male-specific region of the human Y chromosome is a mosaic of discrete sequence  
307 classes. *Nature.* 2003;423(6942):825-37. doi: 10.1038/nature01722. PubMed PMID:  
308 12815422.
- 309 3. Tyler-Smith C, Brown WR. Structure of the major block of alphoid satellite DNA on  
310 the human Y chromosome. *J Mol Biol.* 1987;195(3):457-70. PubMed PMID: 2821279.
- 311 4. Jain M, Olsen HE, Turner DJ, Stoddart D, Bulazel KV, Paten B, et al. Linear assembly  
312 of a human centromere on the Y chromosome. *Nat Biotechnol.* 2018;36(4):321-3. doi:  
313 10.1038/nbt.4109. PubMed PMID: 29553574; PubMed Central PMCID:  
314 PMCPMC5886786.

- 315 5. Tyler-Smith C, Oakey RJ, Larin Z, Fisher RB, Crocker M, Affara NA, et al.  
316 Localization of DNA sequences required for human centromere function through an  
317 analysis of rearranged Y chromosomes. *Nat Genet.* 1993;5(4):368-75. doi:  
318 10.1038/ng1293-368. PubMed PMID: 8298645.
- 319 6. Rozen S, Skaletsky H, Marszalek JD, Minx PJ, Cordum HS, Waterston RH, et al.  
320 Abundant gene conversion between arms of palindromes in human and ape Y  
321 chromosomes. *Nature.* 2003;423(6942):873-6. doi: 10.1038/nature01723. PubMed  
322 PMID: 12815433.
- 323 7. Perry GH, Tito RY, Verrelli BC. The evolutionary history of human and chimpanzee  
324 Y-chromosome gene loss. *Mol Biol Evol.* 2007;24(3):853-9. doi:  
325 10.1093/molbev/msm002. PubMed PMID: 17218643.
- 326 8. Manuelidis L. Chromosomal localization of complex and simple repeated human  
327 DNAs. *Chromosoma.* 1978;66(1):23-32. PubMed PMID: 639625.
- 328 9. Willard HF. Chromosome-specific organization of human alpha satellite DNA. *Am J*  
329 *Hum Genet.* 1985;37(3):524-32. PubMed PMID: 2988334; PubMed Central PMCID:  
330 PMC1684601.
- 331 10. Jorgensen AL, Bostock CJ, Bak AL. Homologous subfamilies of human alphoid  
332 repetitive DNA on different nucleolus organizing chromosomes. *Proc Natl Acad Sci U S*  
333 *A.* 1987;84(4):1075-9. PubMed PMID: 3469648; PubMed Central PMCID:  
334 PMC304364.
- 335 11. Wayne JS, Willard HF. Nucleotide sequence heterogeneity of alpha satellite repetitive  
336 DNA: a survey of alphoid sequences from different human chromosomes. *Nucleic Acids*



- 337 Res. 1987;15(18):7549-69. PubMed PMID: 3658703; PubMed Central PMCID:  
338 PMCPMC306267.
- 339 12. Aldrup-Macdonald ME, Sullivan BA. The past, present, and future of human  
340 centromere genomics. *Genes (Basel)*. 2014;5(1):33-50. PubMed PMID: 24683489;  
341 PubMed Central PMCID: PMCPMC3966626.
- 342 13. Rudd MK, Willard HF. Analysis of the centromeric regions of the human genome  
343 assembly. *Trends Genet*. 2004;20(11):529-33. doi: 10.1016/j.tig.2004.08.008. PubMed  
344 PMID: 15475110.
- 345 14. Henikoff S. Near the edge of a chromosome's "black hole". *Trends Genet*.  
346 2002;18(4):165-7. PubMed PMID: 11932007.
- 347 15. Treangen TJ, Salzberg SL. Repetitive DNA and next-generation sequencing:  
348 computational challenges and solutions. *Nat Rev Genet*. 2011;13(1):36-46. doi:  
349 10.1038/nrg3117. PubMed PMID: 22124482; PubMed Central PMCID:  
350 PMCPMC3324860.
- 351 16. Lower SS, McGurk MP, Clark AG, Barbash DA. Satellite DNA evolution: old ideas,  
352 new approaches. *Curr Opin Genet Dev*. 2018;49:70-8. doi: 10.1016/j.gde.2018.03.003.  
353 PubMed PMID: 29579574; PubMed Central PMCID: PMCPMC5975084.
- 354 17. Alkan C, Ventura M, Archidiacono N, Rocchi M, Sahinalp SC, Eichler EE.  
355 Organization and evolution of primate centromeric DNA from whole-genome shotgun  
356 sequence data. *PLoS Comput Biol*. 2007;3(9):1807-18. doi:  
357 10.1371/journal.pcbi.0030181. PubMed PMID: 17907796; PubMed Central PMCID:  
358 PMCPMC1994983.

- 359 18. van Dijk EL, Jaszczyszyn Y, Naquin D, Thermes C. The Third Revolution in  
360 Sequencing Technology. *Trends Genet.* 2018;34(9):666-81. doi:  
361 10.1016/j.tig.2018.05.008. PubMed PMID: 29941292.
- 362 19. McNulty SM, Sullivan BA. Alpha satellite DNA biology: finding function in the  
363 recesses of the genome. *Chromosome Res.* 2018;26(3):115-38. doi: 10.1007/s10577-018-  
364 9582-3. PubMed PMID: 29974361; PubMed Central PMCID: PMC6121732.
- 365 20. Rudd MK, Schueler MG, Willard HF. Sequence organization and functional  
366 annotation of human centromeres. *Cold Spring Harb Symp Quant Biol.* 2003;68:141-9.  
367 PubMed PMID: 15338612.
- 368 21. Rosandic M, Paar V, Basar I. Key-string segmentation algorithm and higher-order  
369 repeat 16mer (54 copies) in human alpha satellite DNA in chromosome 7. *J Theor Biol.*  
370 2003;221(1):29-37. PubMed PMID: 12634041.
- 371 22. Nusbaum C, Mikkelsen TS, Zody MC, Asakawa S, Taudien S, Garber M, et al. DNA  
372 sequence and analysis of human chromosome 8. *Nature.* 2006;439(7074):331-5. doi:  
373 10.1038/nature04406. PubMed PMID: 16421571.
- 374 23. Gelfand Y, Rodriguez A, Benson G. TRDB--the Tandem Repeats Database. *Nucleic*  
375 *Acids Res.* 2007;35(Database issue):D80-7. doi: 10.1093/nar/gkl1013. PubMed PMID:  
376 17175540; PubMed Central PMCID: PMC6121732.
- 377 24. Warburton PE, Hasson D, Guillem F, Lescale C, Jin X, Abrusan G. Analysis of the  
378 largest tandemly repeated DNA families in the human genome. *BMC Genomics.*  
379 2008;9:533. doi: 10.1186/1471-2164-9-533. PubMed PMID: 18992157; PubMed Central  
380 PMCID: PMC2588610.

- 381 25. Schueler MG, Higgins AW, Rudd MK, Gustashaw K, Willard HF. Genomic and  
382 genetic definition of a functional human centromere. *Science*. 2001;294(5540):109-15.  
383 doi: 10.1126/science.1065042. PubMed PMID: 11588252.
- 384 26. Miga KH, Newton Y, Jain M, Altemose N, Willard HF, Kent WJ. Centromere  
385 reference models for human chromosomes X and Y satellite arrays. *Genome Res*.  
386 2014;24(4):697-707. doi: 10.1101/gr.159624.113. PubMed PMID: 24501022; PubMed  
387 Central PMCID: PMCPMC3975068.
- 388 27. Paar V, Gluncic M, Basar I, Rosandic M, Paar P, Cvitkovic M. Large tandem, higher  
389 order repeats and regularly dispersed repeat units contribute substantially to divergence  
390 between human and chimpanzee Y chromosomes. *J Mol Evol*. 2011;72(1):34-55. doi:  
391 10.1007/s00239-010-9401-8. PubMed PMID: 21103868.
- 392 28. Rosenbloom KR, Armstrong J, Barber GP, Casper J, Clawson H, Diekhans M, et al.  
393 The UCSC Genome Browser database: 2015 update. *Nucleic Acids Res*.  
394 2015;43(Database issue):D670-81. doi: 10.1093/nar/gku1177. PubMed PMID:  
395 25428374; PubMed Central PMCID: PMCPMC4383971.
- 396 29. Shepelev VA, Uralsky LI, Alexandrov AA, Yurov YB, Rogaev EI, Alexandrov IA.  
397 Annotation of suprachromosomal families reveals uncommon types of alpha satellite  
398 organization in pericentromeric regions of hg38 human genome assembly. *Genom Data*.  
399 2015;5:139-46. doi: 10.1016/j.gdata.2015.05.035. PubMed PMID: 26167452; PubMed  
400 Central PMCID: PMCPMC4496801.
- 401 30. Tyner C, Barber GP, Casper J, Clawson H, Diekhans M, Eisenhart C, et al. The  
402 UCSC Genome Browser database: 2017 update. *Nucleic Acids Res*. 2017;45(D1):D626-

403 D34. doi: 10.1093/nar/gkw1134. PubMed PMID: 27899642; PubMed Central PMCID:  
404 PMCPMC5210591.

405 31. Uralsky LI, Shepelev VA, Alexandrov AA, Yurov YB, Rogaev EI, Alexandrov IA.  
406 Classification and monomer-by-monomer annotation dataset of suprachromosomal  
407 family 1 alpha satellite higher-order repeats in hg38 human genome assembly. Data  
408 Brief. 2019;24:103708. doi: 10.1016/j.dib.2019.103708. PubMed PMID: 30989093;  
409 PubMed Central PMCID: PMCPMC6447721.

410 32. Tyler-Smith C. Structure of repeated sequences in the centromeric region of the  
411 human Y chromosome. Development. 1987;101 Suppl:93-100. PubMed PMID: 3503726.

412 33. Gluncic M, Paar V. Direct mapping of symbolic DNA sequence into frequency  
413 domain in global repeat map algorithm. Nucleic Acids Res. 2013;41(1):e17. doi:  
414 10.1093/nar/gks721. PubMed PMID: 22977183; PubMed Central PMCID:  
415 PMCPMC3592446.

416 34. Vlahovic I, Gluncic M, Rosandic M, Ugarkovic E, Paar V. Regular Higher Order  
417 Repeat Structures in Beetle *Tribolium castaneum* Genome. Genome Biol Evol.  
418 2017;9(10):2668-80. doi: 10.1093/gbe/evw174. PubMed PMID: 27492235; PubMed  
419 Central PMCID: PMCPMC5737470.

420 35. Rosandic M, Paar V, Basar I, Gluncic M, Pavin N, Pilas I. CENP-B box and pJalpha  
421 sequence distribution in human alpha satellite higher-order repeats (HOR). Chromosome  
422 Res. 2006;14(7):735-53. doi: 10.1007/s10577-006-1078-x. PubMed PMID: 17115329.

423 36. Levenshtein VI. Binary codes capable of correcting deletions, insertions, and  
424 reversals. Doklady Akademii Nauk SSSR. 1965;163 (4):845-8.

425

426

427 **Supporting information captions**

428 **Supplementary Tables S1**

429 **a) Consensus sequence of canonical 34/36mer HOR in domain I**

430 **b) Consensus sequence of variant 34mer HOR in domain II**

431 **c) Consensus sequence of variant 34mer HOR in domain III**

432

433 **Figures**

434 **Fig. 1 Ideogram of alpha satellite HOR arrays in domains I.-III. of hg38 assembly in**  
435 **centromeric/pericentromeric region of human chromosome Y.** Enumeration of HOR  
436 array positions refers to hg38 assembly. NS denotes gaps in hg38 assembly.

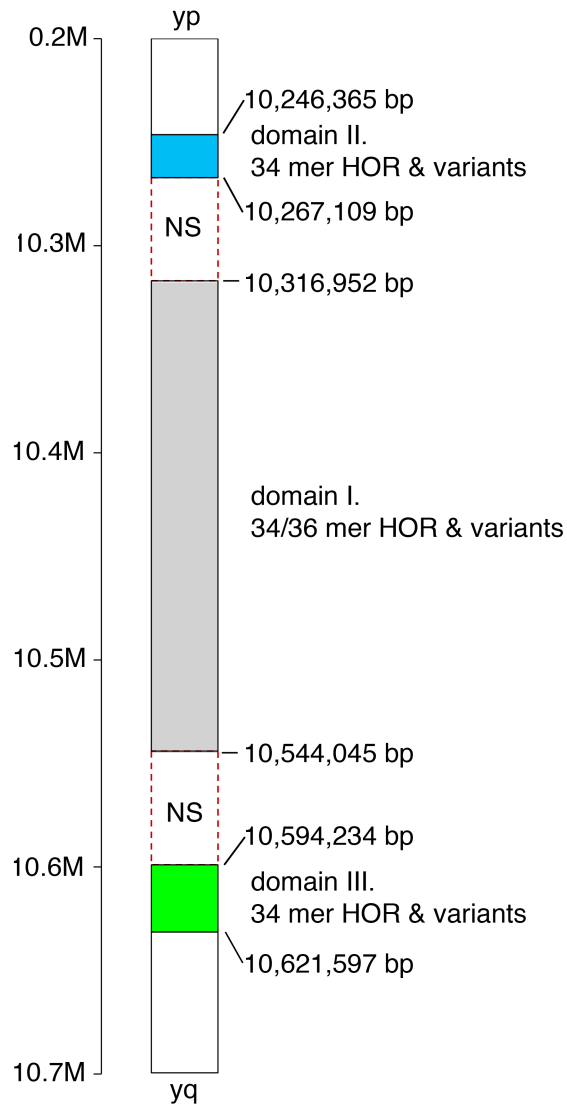

437

438

439 **Fig. 2 GRM diagram for domain I: of hg38 assembly of human chromosome Y.** The  
440 pronounced peak at 5,786 bp corresponds to 34/36mer HOR. Since the average length of  
441 alpha satellite monomer is ~171 bp, the 5,786 bp peak in GRM diagram of human Y  
442 chromosome corresponds to  $n \sim 5,786 \text{ bp} / 171 \text{ bp} \sim 33.8 \sim 34$  monomers. This is close to  
443 the previous length estimates of 5.7 kb [3] and 5.8 kb [4] for the major HOR in human  
444 chromosome Y.

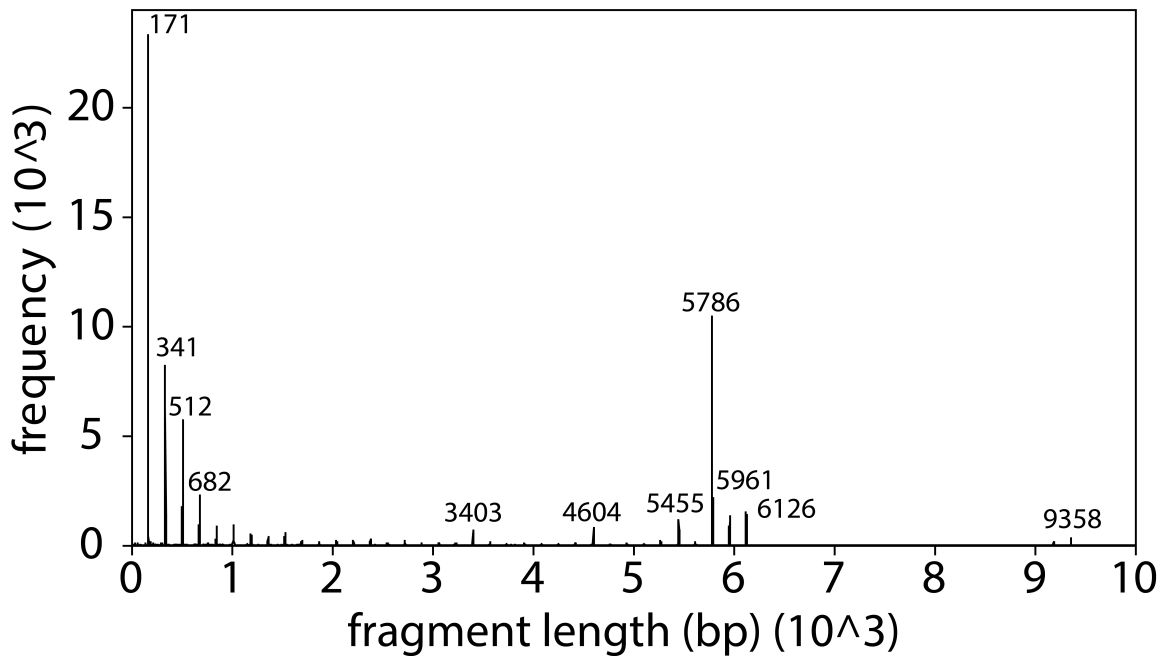

445  
446

447 **Fig. 3 Monomer alignment schemes for canonical alpha satellite 34mer HORs and**  
448 **its polymorphic variants in hg38 assembly of human Y chromosome – (a) domain I,**  
449 **(b) domain II, and (c) domain III.** Top row in all three schemes denotes types of alpha  
450 satellite monomers. Each monomer is schematically presented by a horizontal bar in the  
451 column of the corresponding monomer type. Any duplicate of a HOR monomer (in most  
452 cases defined by divergence of less than 5%) is displayed in alignment scheme by an  
453 additional horizontal bar below the bar of the corresponding primary monomer; a position  
454 of a duplicate monomer is indicated by an arrow. 37 monomers  $m_1, m_2, \dots, m_{37}$  denote  
455 the 37 types of monomers in order of appearance. The monomer types  $m_8, m_{15}$  and  $m_{16}$   
456 are absent in most of HOR copies and therefore, they are referred to as non-canonical  
457 monomers. Thus, most of HOR copies, like for example h5 (10340785), contain 34  
458 monomers  $m_1, m_2, \dots, m_7, m_9, m_{10}, \dots, m_{14}, m_{17}, m_{18}, \dots, m_{37}$ , representing the  
459 canonical 34mer HOR. The domains II and III have been inserted in the hg38 assembly  
460 sequence of Y chromosome in reverse orientation, considering the orientation of domain  
461 I. Here, we present domain II and domain III monomer alignment schemes for canonical  
462 alpha satellite 34mer HORs and its polymorphic variants in direct orientations and adjust  
463 the start of HOR sequences to match the individual monomers from domains II and III to  
464 monomers in domain I. In addition, each HOR structure contains additional inserted non-  
465 HOR alpha satellite monomers:  $a_1$  - array of two inserted monomers,  $b_1$  - array of eight  
466 inserted monomers,  $c_1$  - array of eight inserted monomers, and  $c_2$  - one inserted  
467 monomer. The arrays of eight inserted monomers  $b_1$  and  $c_1$  are similar up to 5% (see Fig.  
468 4d).





471 **Fig. 4 Heatmap for divergence of consensus monomer types among domains: (a)**  
472 **HOR consensus monomers in domains I vs. II, (b) HOR consensus monomers in**  
473 **domains I vs. III, (c) HOR consensus monomers in domains II vs. III, (d) non-HOR**  
474 **monomer array in domain II vs III (b<sub>1</sub> vs c<sub>1</sub> from Fig 3). We conveniently adjust the**  
475 **starting monomers within consensus HOR copies. The positions of the same type**  
476 **monomers in domains I vs. II, I vs. III, and II vs. III lie on diagonal. It is obvious that**  
477 **monomers m15 and m16 in domains I and II have no monomer counterparts (below 5%**  
478 **identity) in domain III which corresponds the HOR schemes from Fig 3. The array of 8**  
479 **inserted monomers in domain II (b<sub>1</sub> in Fig 3b) is similar (up to 5%) to array of 8 inserted**  
480 **monomers in domain III (c<sub>1</sub> in Fig 3c).**

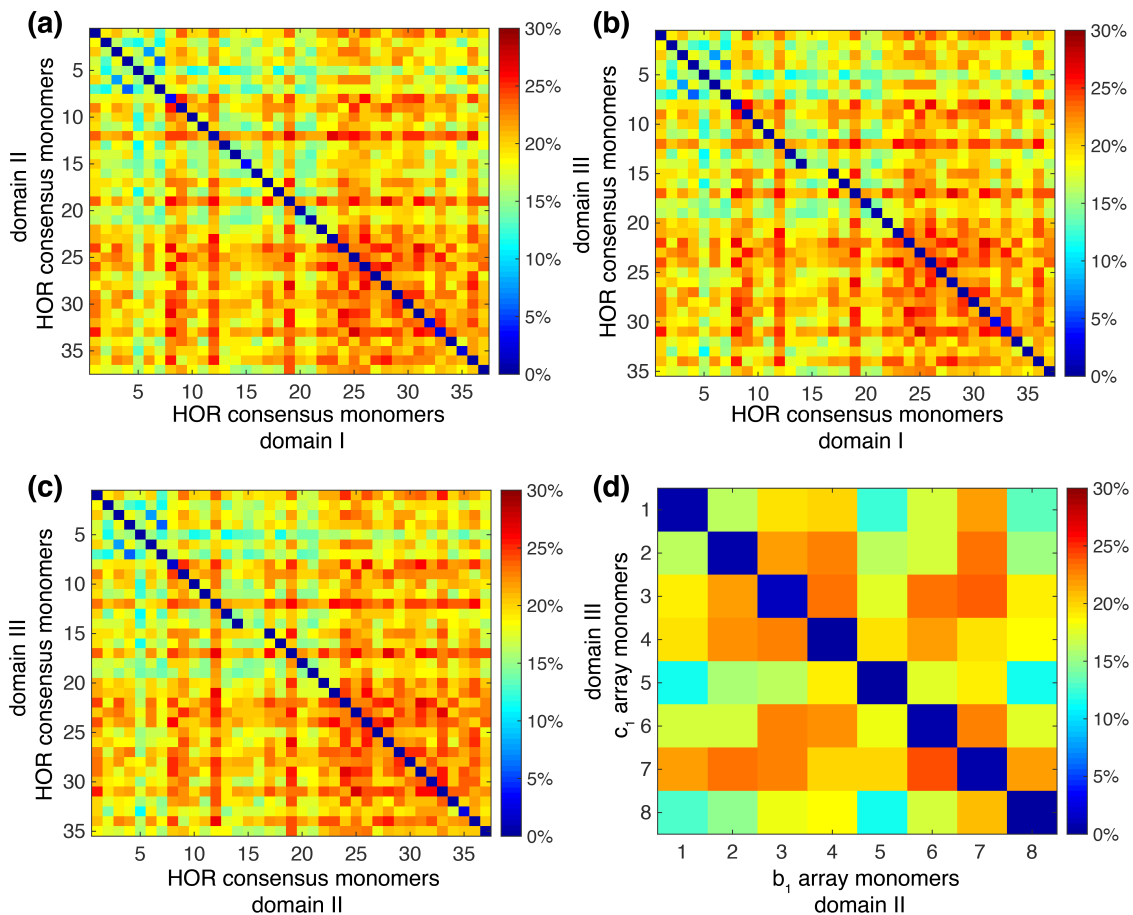

481
